# Supplementary material
Source: MDPI journal article supplement (https://www.mdpi.com/2076-3298/11/3/43)
Supplement: s1 [file s1]

## Supplementary material

**Title:** Lead (Pb) Pollution in Soil: A Systematic Review and Meta-Analysis of Contamination Grade and Health Risk in Mexico

**Journal:** Environments

Jorge Briseño-Bugarín <sup>1, †</sup>, Xelha Araujo-Padilla <sup>1, †</sup>, Victor Manuel Escot-Espinoza <sup>1</sup>, Jaime Cardoso-Ortiz <sup>1</sup>, Juan Armando Flores de la Torre <sup>1</sup> and Argelia López-Luna <sup>1,\*</sup>

<sup>1</sup> Laboratorio de Toxicología y Farmacia, Área de Ciencias de la Salud, Unidad Académica de Ciencias Químicas, Universidad Autónoma de Zacatecas, Zacatecas 98160, México

\* Correspondence: mariaa.lopez@uaz.edu.mx

† These authors contributed equally to this work

**Table S1.** Indexes of geoaccumulation, ecological risk, hazard, and cancer risk in mining/tailing soils.

| Location                 | I <sub>geo</sub> | ERI          | HI          |              | CRI (10 <sup>-6</sup> ) |               |
|--------------------------|------------------|--------------|-------------|--------------|-------------------------|---------------|
|                          |                  |              | Adult       | Children     | Adult                   | Children      |
| AGU, Asientos            | 2.0              | 30.5         | 0.7         | 3.2          | 6.67                    | 7.25          |
|                          | 5.8              | 427.7        | 10.3        | 44.5         | 93.62                   | 101.69        |
|                          | Mean             | <b>3.9</b>   | <b>5.5</b>  | <b>23.9</b>  | <b>50.1</b>             | <b>54.5</b>   |
| BCS, Los Planes basin    | -2.5             | 1.3          | 0.0         | 0.1          | 0.29                    | 0.31          |
|                          | -3.4             | 0.7          | 0.0         | 0.1          | 0.16                    | 0.17          |
|                          | Mean             | <b>-2.9</b>  | <b>0.0</b>  | <b>0.1</b>   | <b>0.2</b>              | <b>0.2</b>    |
| HID, Zimapán             | 3.9              | 113.0        | 2.7         | 11.7         | 24.73                   | 26.86         |
|                          | 3.6              | 93.6         | 2.3         | 9.7          | 20.49                   | 22.26         |
|                          | 5.8              | 409.6        | 9.9         | 42.6         | 89.65                   | 97.38         |
|                          | 4.0              | 118.4        | 2.9         | 12.3         | 25.93                   | 28.16         |
|                          | Mean             | <b>4.3</b>   | <b>4.5</b>  | <b>19.1</b>  | <b>40.2</b>             | <b>43.7</b>   |
| GRO, Taxco               | <b>4.4</b>       | <b>154.1</b> | <b>3.7</b>  | <b>16.0</b>  | <b>33.73</b>            | <b>36.63</b>  |
| GUA, Pozos               | <b>2.6</b>       | <b>45.0</b>  | <b>1.1</b>  | <b>4.7</b>   | <b>9.85</b>             | <b>10.70</b>  |
| GUA, Xichú               | <b>4.9</b>       | <b>216.9</b> | <b>5.2</b>  | <b>22.5</b>  | <b>47.48</b>            | <b>51.57</b>  |
| QUE, Maconí              | <b>1.6</b>       | <b>23.4</b>  | <b>0.6</b>  | <b>2.4</b>   | <b>5.13</b>             | <b>5.57</b>   |
| QUE, Peñamiller          | <b>-4.9</b>      | <b>0.3</b>   | <b>0.0</b>  | <b>0.0</b>   | <b>0.06</b>             | <b>0.06</b>   |
| SLP, Cedral              | <b>6.7</b>       | <b>801.3</b> | <b>19.3</b> | <b>83.3</b>  | <b>175.40</b>           | <b>190.52</b> |
| SLP, Cerro de San Pedro  | <b>6.7</b>       | <b>781.5</b> | <b>18.8</b> | <b>81.2</b>  | <b>171.06</b>           | <b>185.81</b> |
| SLP, Charcas             | 8.3              | 2,394.4      | 57.7        | 248.9        | 524.11                  | 569.29        |
|                          | 3.3              | 74.1         | 1.8         | 7.7          | 16.21                   | 17.61         |
|                          | Mean             | <b>5.8</b>   | <b>29.8</b> | <b>128.3</b> | <b>270.2</b>            | <b>293.5</b>  |
| SLP, Villa de la Paz     | 4.5              | 168.1        | 4.1         | 17.5         | 36.80                   | 39.97         |
|                          | 3.8              | 102.8        | 2.5         | 10.7         | 22.50                   | 24.44         |
|                          | 7.1              | 1,016.3      | 24.5        | 105.6        | 222.46                  | 241.64        |
|                          | 3.6              | 90.2         | 2.2         | 9.4          | 19.74                   | 21.45         |
|                          | 5.8              | 412.4        | 9.9         | 42.9         | 90.26                   | 98.05         |
|                          | Mean             | <b>5.0</b>   | <b>8.6</b>  | <b>37.2</b>  | <b>78.4</b>             | <b>85.1</b>   |
| SON, San Felipe de Jesús | 9.0              | 3,942.2      | 95.0        | 409.7        | 862.92                  | 937.31        |
|                          | 8.5              | 2,733.9      | 65.9        | 284.1        | 598.43                  | 650.01        |
|                          | Mean             | <b>8.8</b>   | <b>80.5</b> | <b>346.9</b> | <b>730.7</b>            | <b>793.7</b>  |
| SON, Nacozari de García  | 0.8              | 13.0         | 0.3         | 1.3          | 2.84                    | 3.08          |
|                          | -1.5             | 2.6          | 0.1         | 0.3          | 0.57                    | 0.62          |
|                          | Mean             | <b>-0.4</b>  | <b>0.2</b>  | <b>0.8</b>   | <b>1.7</b>              | <b>1.9</b>    |
| ZAC, Vetagrande          | 6.6              | 737.8        | 17.8        | 76.7         | 161.49                  | 175.42        |
|                          | 4.4              | 158.0        | 3.81        | 16.42        | 34.58                   | 37.56         |
|                          | 6.0              | 491.9        | 11.86       | 51.12        | 107.66                  | 116.94        |
|                          | Mean             | <b>5.7</b>   | <b>11.2</b> | <b>48.1</b>  | <b>101.2</b>            | <b>110.0</b>  |

CRI, cancer risk index; ERI, ecological risk index; HI, hazard index; I<sub>geo</sub>, geoaccumulation index. AGU, Aguascalientes; BCS, Baja California Sur; GUA, Guanajuato; GRO, Guerrero; HID, Hidalgo; QUE, Querétaro; SLP, San Luis Potosí; SON, Sonora; ZAC, Zacatecas.

**Table S2.** Indexes of geoaccumulation, ecological risk, hazard, and cancer risk in agricultural soils.

| Location                    | I <sub>geo</sub> | ERI     | HI    |          | CRI (10 <sup>-6</sup> ) |          |
|-----------------------------|------------------|---------|-------|----------|-------------------------|----------|
|                             |                  |         | Adult | Children | Adult                   | Children |
| AGU, Asientos               | 3.2              | 68.9    | 1.7   | 7.2      | 15.09                   | 16.39    |
| BCN, Cerro Prieto           | -1.0             | 3.7     | 0.1   | 0.4      | 0.81                    | 0.88     |
| CHH, Aldama                 | -0.4             | 5.6     | 0.1   | 0.6      | 1.24                    | 1.34     |
| CHH, Juarez Valley          | -0.8             | 4.3     | 0.1   | 0.5      | 0.95                    | 1.03     |
| DUR, Santiago Papasquiaro   | 2.7              | 47.6    | 1.1   | 4.9      | 10.41                   | 11.31    |
| GRO, Santa Rosa             | 2.5              | 42.5    | 1.0   | 4.4      | 9.28                    | 10.08    |
|                             | 0.6              | 11.1    | 0.3   | 1.2      | 2.43                    | 2.64     |
|                             | 6.3              | 605.5   | 14.6  | 62.9     | 132.54                  | 143.96   |
|                             | Mean             | 3.1     | 219.7 | 5.3      | 48.1                    | 52.2     |
| HID, Zimapán                | 3.6              | 93.6    | 2.3   | 9.7      | 20.49                   | 22.26    |
|                             | 4.1              | 124.8   | 3.0   | 13.0     | 27.32                   | 29.68    |
|                             | 5.4              | 319.0   | 7.7   | 33.2     | 69.83                   | 75.85    |
|                             | 5.6              | 373.9   | 9.0   | 38.9     | 81.85                   | 88.91    |
|                             | Mean             | 4.7     | 227.8 | 5.5      | 49.9                    | 54.2     |
| SON, San Felipe de Jesús    | 5.4              | 309.9   | 7.5   | 32.2     | 67.83                   | 73.68    |
| SON, Yaqui and Mayo valleys | 0.0              | 7.4     | 0.2   | 0.8      | 1.63                    | 1.77     |
|                             | -0.8             | 4.3     | 0.1   | 0.4      | 0.94                    | 1.02     |
|                             | Mean             | -0.4    | 5.9   | 0.6      | 1.3                     | 1.4      |
| ZAC, Vetagrande             | 7.5              | 1,392.0 | 33.6  | 144.7    | 304.69                  | 330.96   |

CRI, cancer risk index; ERI, ecological risk index; HI, hazard index; I<sub>geo</sub>, geoaccumulation index. AGU, Aguascalientes; BCN, Baja California Norte; CHH, Chihuahua; DUR, Durango; GRO, Guerrero; HID, Hidalgo; SLP, San Luis Potosí; SON, Sonora; ZAC, Zacatecas.

**Table S3.** Indexes of geoaccumulation, ecological risk, hazard, and cancer risk in residential soils.

| Location                  | I <sub>geo</sub> | ERI     | HI     |          | CRI (10 <sup>-6</sup> ) |          |
|---------------------------|------------------|---------|--------|----------|-------------------------|----------|
|                           |                  |         | Adult  | Children | Adult                   | Children |
| AGU, Asientos             | -0.1             | 7.2     | 0.17   | 0.75     | 1.58                    | 1.72     |
|                           | 1.2              | 16.8    | 0.40   | 1.74     | 3.67                    | 3.98     |
|                           | Mean             | 0.6     | 12.0   | 0.3      | 2.6                     | 2.9      |
| BCS, Los Planes basin     | -3.0             | 1.0     | 0.02   | 0.10     | 0.21                    | 0.23     |
|                           | -6.7             | 0.1     | 0.00   | 0.01     | 0.02                    | 0.02     |
|                           | Mean             | -4.9    | 0.6    | 0.0      | 0.1                     | 0.1      |
| CHH, Chihuahua            | 5.2              | 277.6   | 6.69   | 28.85    | 60.76                   | 66.00    |
| COA, Tlaxcala             | 9.0              | 3,922.0 | 94.55  | 407.64   | 858.50                  | 932.51   |
|                           | 3.9              | 109.1   | 2.63   | 11.34    | 23.88                   | 25.93    |
|                           | 3.2              | 69.3    | 1.67   | 7.20     | 15.16                   | 16.47    |
|                           | Mean             | 5.4     | 1366.8 | 33.0     | 299.2                   | 325.0    |
| DUR, Durango              | 1.4              | 19.9    | 0.48   | 2.07     | 4.35                    | 4.72     |
| MOR, Tlayacapan           | 2.3              | 36.1    | 0.87   | 3.75     | 7.90                    | 8.59     |
| NLE, Monterrey            | 1.0              | 15.4    | 0.37   | 1.61     | 3.38                    | 3.67     |
|                           | 3.5              | 84.3    | 2.03   | 8.76     | 18.44                   | 20.03    |
|                           | Mean             | 2.3     | 49.9   | 1.2      | 10.9                    | 11.9     |
| PUE, Popocatepetl volcano | 0.6              | 11.2    | 0.27   | 1.16     | 2.44                    | 2.66     |
| SLP, Cedral               | 2.7              | 48.7    | 1.17   | 5.06     | 10.66                   | 11.58    |
| SLP, Cerro de San Pedro   | 7.3              | 1,200.9 | 28.95  | 124.82   | 262.88                  | 285.54   |
| SLP, “Las Terceras”       | 0.6              | 11.2    | 0.27   | 1.16     | 2.45                    | 2.66     |
| SLP, Morales              | 3.8              | 105.6   | 2.54   | 10.97    | 23.11                   | 25.10    |
| SLP, San Luis Potosí      | 1.4              | 20.0    | 0.48   | 2.08     | 4.38                    | 4.76     |
| SLP, Villa de la Paz      | 3.5              | 84.8    | 2.04   | 8.82     | 18.57                   | 20.17    |
|                           | 4.7              | 195.1   | 4.70   | 20.28    | 42.71                   | 46.39    |
|                           | 3.2              | 69.1    | 1.67   | 7.19     | 15.14                   | 16.44    |

|                          | Mean | 3.8   | 116.3 | 2.8   | 12.1  | 25.5  | 27.7 |
|--------------------------|------|-------|-------|-------|-------|-------|------|
| SON, Hermosillo          | 0.6  | 11.1  | 0.27  | 1.15  | 2.43  | 2.64  |      |
| TLA, Trinidad Tenexyecac | 4.8  | 208.5 | 5.03  | 21.67 | 45.64 | 49.58 |      |

CRI, cancer risk index; ERI, ecological risk index; HI, hazard index; Igeo, geoaccumulation index. AGU, Aguascalientes; BCS, Baja California Sur; CHH, Chihuahua; COA, Coahuila; DUR, Durango; MOR, Morelos; NLE, Nuevo León; PUE, Puebla; SLP; San Luis Potosí; SON, Sonora, and TLA, Tlaxcala.

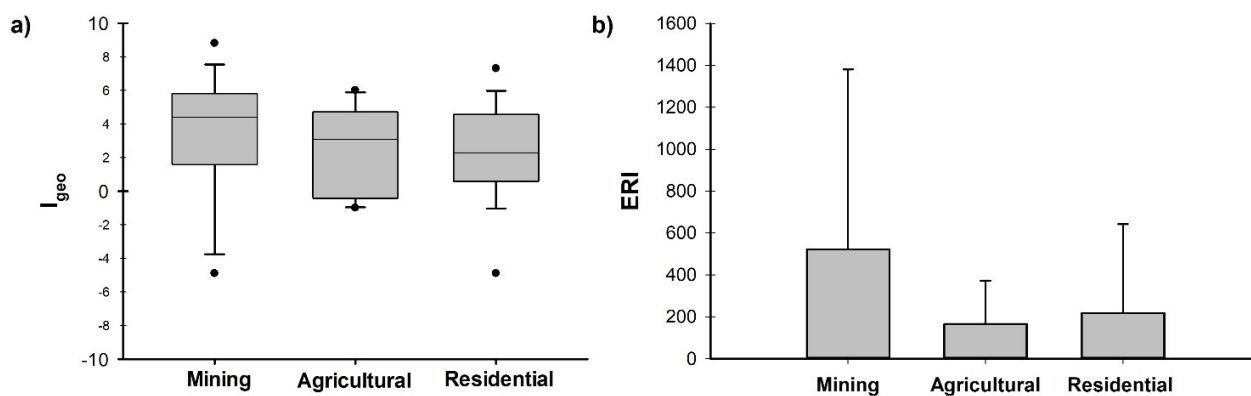

**Figure S1.**  $I_{geo}$  and ERI values (a and b, respectively) averaged and graphed to compare Pb contamination by land uses.
